# Supplementary material
Source: PubMed Central journal article supplement (PMC6584322)
Supplement: jamaoncol-4-798-s001.pdf [file jamaoncol-4-798-s001.pdf]

## Supplementary Online Content

Caan BJ, Feliciano EMC, Prado CM, et al. Association of muscle and adiposity measured by computed tomography with survival in patients with nonmetastatic breast cancer. *JAMA Oncol*. Published online April 5, 2018. doi:10.1001/jamaoncol.2018.0137

**eTable 1.** Characteristics of the cohort

**eTable 2.** Multivariable models for overall mortality by age, body mass index, cancer stage and estrogen receptor status

**eTable 3.** Distribution of body composition measures

This supplementary material has been provided by the authors to give readers additional information about their work.

**eTable 1: Characteristics of the cohort**

**eTable 2: Multivariable models for overall mortality by age, body mass index, cancer stage and estrogen receptor status**

**eTable 3: Distribution of body composition measures**

| eTable 1. Characteristics of the cohort        |             |      |                         |             |              |                                  |             |              |
|------------------------------------------------|-------------|------|-------------------------|-------------|--------------|----------------------------------|-------------|--------------|
|                                                | Total       |      | Sarcopenia <sup>a</sup> |             |              | Muscle Radiodensity <sup>b</sup> |             |              |
|                                                |             |      | No                      | Yes         |              | Normal                           | Low         |              |
|                                                | 3,241       |      | 2,155                   | 1,086       |              | 2,048                            | 1,193       |              |
|                                                | N           | Col% | Col%                    | Col%        |              | Col%                             | Col%        |              |
| <b>Age at diagnosis, Mean (SD)<sup>c</sup></b> |             |      |                         |             |              |                                  |             |              |
|                                                | 54.1 (11.8) |      | 52.7 (11.4)             | 57.0 (12.0) | <sup>d</sup> | 50.3 (10.7)                      | 60.6 (10.6) | <sup>d</sup> |
| <b>Body Mass Index at scan, Mean (SD)</b>      |             |      |                         |             |              |                                  |             |              |
|                                                | 28.3 (6.3)  |      | 30.0 (6.4)              | 24.7 (4.3)  | <sup>d</sup> | 26.6 (5.4)                       | 31.1 (6.8)  | <sup>d</sup> |
| <b>Age, categories</b>                         |             |      |                         |             |              |                                  |             |              |
| 20-29                                          | 43          | 1.3  | 1.7                     | 0.6         | <sup>d</sup> | 2.0                              | 0.2         | <sup>d</sup> |
| 30-39                                          | 326         | 10.1 | 11.1                    | 8.0         |              | 13.8                             | 3.6         |              |
| 40-49                                          | 807         | 24.9 | 27.3                    | 20.1        |              | 32.6                             | 11.7        |              |
| 50-59                                          | 990         | 30.5 | 31.8                    | 28.0        |              | 31.4                             | 29.1        |              |
| 60-69                                          | 714         | 22.0 | 20.0                    | 26.0        |              | 15.9                             | 32.6        |              |
| >=70                                           | 361         | 11.1 | 8.0                     | 17.4        |              | 4.3                              | 22.8        |              |
| <b>Race/Ethnicity</b>                          |             |      |                         |             |              |                                  |             |              |
| White                                          | 2,263       | 70.3 | 67.8                    | 74.4        | <sup>d</sup> | 66.8                             | 76.4        | <sup>d</sup> |
| Black                                          | 233         | 7.2  | 9.3                     | 3.1         |              | 7.7                              | 6.5         |              |
| Hispanic                                       | 281         | 8.7  | 10.5                    | 5.3         |              | 8.4                              | 9.3         |              |
| Asian/PI                                       | 405         | 12.6 | 11.2                    | 15.3        |              | 15.8                             | 7.1         |              |
| Other                                          | 36          | 1.1  | 1.2                     | 1.1         |              | 1.3                              | 0.8         |              |
| <b>AJCC<sup>e</sup> Stage</b>                  |             |      |                         |             |              |                                  |             |              |
| II                                             | 1950        | 60.2 | 59.6                    | 61.2        |              | 61.8                             | 57.3        | <sup>f</sup> |
| III                                            | 1291        | 39.8 | 40.4                    | 38.8        |              | 38.2                             | 42.7        |              |
| <b>Grade</b>                                   |             |      |                         |             |              |                                  |             |              |
| Well-diff                                      | 298         | 9.2  | 9.1                     | 9.3         |              | 9.3                              | 9.1         |              |
| Moderately                                     | 1267        | 39.1 | 39.5                    | 38.2        |              | 37.5                             | 41.9        |              |
| Poor/Undiff                                    | 1536        | 47.4 | 47.0                    | 48.3        |              | 49.1                             | 44.5        |              |
| Missing                                        | 140         | 4.3  | 4.4                     | 4.2         |              | 4.2                              | 4.5         |              |
| <b>Chemotherapy</b>                            |             |      |                         |             |              |                                  |             |              |
| No                                             | 428         | 13.3 | 11.8                    | 16.3        | <sup>f</sup> | 9.4                              | 20.0        | <sup>d</sup> |
| Yes                                            | 2,793       | 86.7 | 88.2                    | 83.7        |              | 90.6                             | 80.0        |              |
| <b>ER<sup>g</sup> Status</b>                   |             |      |                         |             |              |                                  |             |              |
| Negative                                       | 872         | 27.0 | 25.5                    | 29.9        | <sup>f</sup> | 28.6                             | 24.2        | <sup>f</sup> |
| Positive                                       | 2363        | 73.0 | 74.5                    | 70.1        |              | 71.4                             | 75.8        |              |

|                                                                            |      |      |  |      |      |              |      |      |              |
|----------------------------------------------------------------------------|------|------|--|------|------|--------------|------|------|--------------|
| <b>HER2<sup>h</sup> Status</b>                                             |      |      |  |      |      |              |      |      |              |
| Negative                                                                   | 2376 | 73.3 |  | 73.2 | 73.5 |              | 70.5 | 78.2 | <sup>d</sup> |
| Positive                                                                   | 676  | 20.9 |  | 21.0 | 20.6 |              | 23.4 | 16.4 |              |
| Missing                                                                    | 189  | 5.8  |  | 5.8  | 5.9  |              | 6.1  | 5.4  |              |
| <b>Smoking</b>                                                             |      |      |  |      |      |              |      |      |              |
| Never                                                                      | 1911 | 59.0 |  | 58.3 | 60.5 |              | 62.3 | 53.4 | <sup>d</sup> |
| Former                                                                     | 966  | 29.8 |  | 29.6 | 30.3 |              | 27.8 | 33.2 |              |
| Current                                                                    | 292  | 9.0  |  | 9.8  | 7.4  |              | 8.1  | 10.7 |              |
| Missing                                                                    | 70   | 2.2  |  | 2.3  | 1.8  |              | 1.8  | 2.8  |              |
| <b>BMI<sup>i</sup> at scan, categories</b>                                 |      |      |  |      |      |              |      |      |              |
| 18.5-<25                                                                   | 1112 | 36.2 |  | 23.5 | 61.4 | <sup>d</sup> | 46.5 | 18.7 | <sup>d</sup> |
| 25-<30                                                                     | 968  | 31.5 |  | 33.8 | 26.9 |              | 32.0 | 30.7 |              |
| 30-<35                                                                     | 563  | 18.3 |  | 22.8 | 9.3  |              | 13.9 | 25.9 |              |
| >=35                                                                       | 431  | 14.0 |  | 19.9 | 2.3  |              | 7.7  | 24.7 |              |
| 630 deaths, median follow-up = 6.1 years (range 0.1-16.4)                  |      |      |  |      |      |              |      |      |              |
| <sup>a</sup> Cutpoint for sarcopenia: <40 cm <sup>2</sup> /ht <sup>2</sup> |      |      |  |      |      |              |      |      |              |
| <sup>b</sup> Cutpoint for low radiodensity: <37.8 Hounsfield Units, HU     |      |      |  |      |      |              |      |      |              |
| <sup>c</sup> SD = Standard deviation                                       |      |      |  |      |      |              |      |      |              |
| <sup>d</sup> p < 0.0001                                                    |      |      |  |      |      |              |      |      |              |
| <sup>e</sup> AJCC = American Joint Committee on Cancer                     |      |      |  |      |      |              |      |      |              |
| <sup>f</sup> p < 0.05                                                      |      |      |  |      |      |              |      |      |              |
| <sup>g</sup> ER = Estrogen receptor                                        |      |      |  |      |      |              |      |      |              |
| <sup>h</sup> HER2 = Human epidermal growth factor receptor 2               |      |      |  |      |      |              |      |      |              |
| BMI = Body mass index                                                      |      |      |  |      |      |              |      |      |              |

**eTable 2. Multivariable models for overall mortality by age, body mass index, cancer stage and estrogen receptor status<sup>a</sup>**

|                                                                                                                                                                                                                                                                                                                                                                                                                                                                                                                                                                                                                                                                                                                                 | Age at Diagnosis  |                   | Body Mass Index at Scan |                   |                   | Cancer Stage      |                   | Estrogen Receptor Status |                   |  |
|---------------------------------------------------------------------------------------------------------------------------------------------------------------------------------------------------------------------------------------------------------------------------------------------------------------------------------------------------------------------------------------------------------------------------------------------------------------------------------------------------------------------------------------------------------------------------------------------------------------------------------------------------------------------------------------------------------------------------------|-------------------|-------------------|-------------------------|-------------------|-------------------|-------------------|-------------------|--------------------------|-------------------|--|
|                                                                                                                                                                                                                                                                                                                                                                                                                                                                                                                                                                                                                                                                                                                                 | <55 years         | >=55 years        | Normal Weight           | Overweight        | Obese             | Stage II          | Stage III         | Negative                 | Positive          |  |
| #Events/At-risk                                                                                                                                                                                                                                                                                                                                                                                                                                                                                                                                                                                                                                                                                                                 | 252/166           | 367/157           | 199/1163                | 195/1022          | 225/1056          | 283/1950          | 336/1291          | 223/872                  | 396/2363          |  |
|                                                                                                                                                                                                                                                                                                                                                                                                                                                                                                                                                                                                                                                                                                                                 | HR (95% CI)       | HR (95% CI)       | HR (95% CI)             | HR (95% CI)       | HR (95% CI)       | HR (95% CI)       | HR (95% CI)       | HR (95% CI)              | HR (95% CI)       |  |
|                                                                                                                                                                                                                                                                                                                                                                                                                                                                                                                                                                                                                                                                                                                                 |                   |                   |                         |                   |                   |                   |                   |                          |                   |  |
| <b>Sarcopenia<sup>b</sup></b>                                                                                                                                                                                                                                                                                                                                                                                                                                                                                                                                                                                                                                                                                                   |                   |                   |                         |                   |                   |                   |                   |                          |                   |  |
| Non-sarcopenic                                                                                                                                                                                                                                                                                                                                                                                                                                                                                                                                                                                                                                                                                                                  | Referent          | Referent          | Referent                | Referent          | Referent          | Referent          | Referent          | Referent                 | Referent          |  |
| Sarcopenic                                                                                                                                                                                                                                                                                                                                                                                                                                                                                                                                                                                                                                                                                                                      | 1.73 (1.30, 2.30) | 1.22 (0.97, 1.53) | 1.36 (0.99, 1.86)       | 1.54 (1.12, 2.11) | 1.31 (0.92, 1.87) | 1.50 (1.15, 1.95) | 1.40 (1.10, 1.78) | 1.31 (0.96, 1.77)        | 1.48 (1.19, 1.85) |  |
| p for interaction                                                                                                                                                                                                                                                                                                                                                                                                                                                                                                                                                                                                                                                                                                               |                   | 0.26              |                         |                   | 0.34              |                   | 0.79              |                          | 0.24              |  |
| <b>Muscle Radiodensity<sup>c</sup></b>                                                                                                                                                                                                                                                                                                                                                                                                                                                                                                                                                                                                                                                                                          |                   |                   |                         |                   |                   |                   |                   |                          |                   |  |
| Normal radiodensity                                                                                                                                                                                                                                                                                                                                                                                                                                                                                                                                                                                                                                                                                                             | Referent          | Referent          | Referent                | Referent          | Referent          | Referent          | Referent          | Referent                 | Referent          |  |
| Low radiodensity                                                                                                                                                                                                                                                                                                                                                                                                                                                                                                                                                                                                                                                                                                                | 1.02 (0.71, 1.46) | 0.88 (0.69, 1.11) | 0.89 (0.60, 1.30)       | 1.12 (0.79, 1.58) | 0.83 (0.60, 1.14) | 1.02 (0.76, 1.36) | 0.91 (0.69, 1.19) | 0.74 (0.53, 1.04)        | 1.09 (0.85, 1.39) |  |
| p for interaction                                                                                                                                                                                                                                                                                                                                                                                                                                                                                                                                                                                                                                                                                                               |                   | 0.93              |                         |                   | 0.10              |                   | 0.23              |                          | 0.25              |  |
| <b>Total Adiposity<sup>d</sup></b>                                                                                                                                                                                                                                                                                                                                                                                                                                                                                                                                                                                                                                                                                              |                   |                   |                         |                   |                   |                   |                   |                          |                   |  |
| Low tertile 1                                                                                                                                                                                                                                                                                                                                                                                                                                                                                                                                                                                                                                                                                                                   | Referent          | Referent          | Referent                | Referent          | Referent          | Referent          | Referent          | Referent                 | Referent          |  |
| Middle tertile 2                                                                                                                                                                                                                                                                                                                                                                                                                                                                                                                                                                                                                                                                                                                | 1.18 (0.86, 1.61) | 1.26 (0.95, 1.68) | 1.28 (0.89, 1.85)       | 1.73 (1.06, 2.82) | 0.57 (0.07, 4.39) | 0.93 (0.69, 1.26) | 1.51 (1.13, 2.02) | 1.30 (0.92, 1.83)        | 1.16 (0.89, 1.51) |  |
| High tertile 3                                                                                                                                                                                                                                                                                                                                                                                                                                                                                                                                                                                                                                                                                                                  | 1.68 (1.17, 2.41) | 1.26 (0.93, 1.70) | 1.22 (0.29, 5.15)       | 1.78 (0.96, 3.27) | 0.70 (0.09, 5.34) | 1.09 (0.78, 1.51) | 1.67 (1.21, 2.30) | 1.50 (1.02, 2.22)        | 1.31 (0.99, 1.74) |  |
| p for interaction                                                                                                                                                                                                                                                                                                                                                                                                                                                                                                                                                                                                                                                                                                               |                   | 0.48              |                         |                   | 0.73              |                   | 0.22              |                          | 0.72              |  |
| <sup>a</sup> All models adjusted for full list of covariates, except the stratified variable, as follows: age at diagnosis (continuous), race (reference=White), stage (reference=II), grade (reference=Well), chemotherapy (reference=No), surgery type (reference=None), smoking (reference=Never), ER (reference=Neg), HER2 (reference=Neg), and partitioned BMI (continuous).<br><sup>b</sup> Models for sarcopenia (skeletal muscle index <40 cm <sup>2</sup> /m <sup>2</sup> ) adjusted for total adiposity in cm <sup>2</sup> (continuous)<br><sup>c</sup> HU = Hounsfield Units<br><sup>d</sup> Models for total adiposity (total adipose tissue, in tertiles) adjusted for muscle area in cm <sup>2</sup> (continuous) |                   |                   |                         |                   |                   |                   |                   |                          |                   |  |

| <b>eTable 3. Distribution of body composition measures</b> |                       |                                 |                              |                            |                        |
|------------------------------------------------------------|-----------------------|---------------------------------|------------------------------|----------------------------|------------------------|
|                                                            |                       | <b>Muscle Area</b>              | <b>Skeletal Muscle Index</b> | <b>Muscle Radiodensity</b> | <b>Total Adiposity</b> |
|                                                            |                       | Mean, Median (IQR) <sup>a</sup> | Mean, Median (IQR)           | Mean, Median (IQR)         | Mean, Median (IQR)     |
| <b>Overall</b>                                             |                       | 115.4, 113.1 (25.2)             | 43.5, 42.8 (9.0)             | 40.6, 41.2 (13.3)          | 356.8, 329.4 (253.2)   |
| <b>Sarcopenia</b>                                          |                       |                                 |                              |                            |                        |
| Non-sarcopenic                                             | ≥40 SMI <sup>b</sup>  | 124.2, 121.5 (21.9)             | 47.2, 45.9 (7.2)             | 41.0, 41.4 (12.6)          | 395.9, 369.3 (264.5)   |
| Sarcopenic                                                 | <40 SMI               | 98.0, 98.7 (14.6)               | 36.2, 36.8 (3.9)             | 40.0, 40.6 (14.3)          | 279.1, 252.8 (190.7)   |
| <b>Muscle Radiodensity</b>                                 |                       |                                 |                              |                            |                        |
| Normal radiodensity                                        | ≥37.8 HU <sup>c</sup> | 115.8, 113.3 (24.5)             | 43.7, 42.8 (8.5)             | 46.6, 45.7 (8.6)           | 294.2, 269.8 (200.1)   |
| Low radiodensity                                           | <37.8 HU              | 114.8, 112.8 (26.9)             | 43.2, 42.7 (10.0)            | 30.5, 31.8 (8.0)           | 464.1, 444.7 (275.6)   |
| <b>Total adiposity</b>                                     |                       |                                 |                              |                            |                        |
| Low tertile 1                                              |                       | 106.8, 105.6 (19.7)             | 40.4, 40.0 (7.4)             | 46.5, 46.9 (11.5)          | 167.8, 176.2 (92.4)    |
| Middle tertile 2                                           |                       | 113.3, 111.9 (21.7)             | 43.0, 42.7 (8.2)             | 40.7, 41.3 (10.6)          | 329.2, 329.4 (75.7)    |
| High tertile 3                                             |                       | 126.2, 124.4 (27.5)             | 47.2, 46.3 (10.7)            | 34.7, 35.2 (12.1)          | 573.3, 541.8 (175.9)   |
| <sup>a</sup> IQR = Interquartile Range                     |                       |                                 |                              |                            |                        |
| <sup>b</sup> SMI = Skeletal Muscle Index                   |                       |                                 |                              |                            |                        |
| <sup>c</sup> HU = Hounsfield Units                         |                       |                                 |                              |                            |                        |
